# Supplementary material
Source: PubMed Central journal article supplement (PMC5578715)
Supplement: NIHMS892232-supplement-5.pdf [file NIHMS892232-supplement-5.pdf]

## **INVENTORY OF SUPPLEMENTAL INFORMATION:**

Supplementary information includes

1. 5 supplementary figures and legends, included in the supplemental figures and text file.
2. 7 supplementary tables
  - a. Tables S1, S4, S5, and S7 are supplied as Excel .xlsx files.
  - b. Tables S2, S3, and S6 are included in the supplemental figures and text file as MS Word tables.
